# Supplementary material for: Fabrication of high tap density LiFe0.6Mn0.4PO4/C microspheres by a double carbon coating–spray drying method for high rate lithium ion batteries
Source: Royal Society of Chemistry journal article supplement (doi:10.1039/c2ta00939k), 2012-12-04
Supplement: c2ta00939k.pdf [file c2ta00939k.pdf]

## Supporting Information

### Fabrication of high tap density $\text{LiFe}_{0.6}\text{Mn}_{0.4}\text{PO}_4/\text{C}$ microspheres by a double carbon coating–spray drying method for high rate lithium ion batteries

Wen Liu<sup>#</sup>, Ping Gao<sup>#</sup>, Yingying Mi, Jitao Chen\*, Henghui Zhou\*, and Xinxiang Zhang

College of Chemistry and Molecular Engineering, Peking University, Beijing 100871, P.R. China

\*To whom correspondence should be addressed. Fax: 86-10-62757908; Tel: 86-10-627757908; E-mail:

hhzhou@pku.edu.cn; chenjitao@pku.edu.cn

**Table S1:** Crystallographic parameters of the high tap density  $\text{LiFe}_{0.6}\text{Mn}_{0.4}\text{PO}_4/\text{C}$  microspheres selected from the Rietveld refinement results

| Space group      | Pnma                                                                       |           |           |           |           |                    |
|------------------|----------------------------------------------------------------------------|-----------|-----------|-----------|-----------|--------------------|
| Type             | Atom                                                                       | x         | y         | Z         | Occupancy | B(Å <sup>2</sup> ) |
| Li +1            | Li1                                                                        | 0.0000(0) | 0.0000(0) | 0.0000(0) | 1.064     | 3.46               |
| Fe+2             | Fe1                                                                        | 0.2818(5) | 0.2500(3) | 0.9736(3) | 0.604     | 2.95               |
| Mn+2             | Mn1                                                                        | 0.2819(2) | 0.2500(3) | 0.9736(2) | 0.398     | 2.80               |
| P                | P1                                                                         | 0.0935(4) | 0.2500(2) | 0.4119(3) | 1.004     | 2.06               |
| O -2             | O1                                                                         | 0.1012(2) | 0.2500(5) | 0.7344(6) | 0.981     | 2.24               |
| O -2             | O2                                                                         | 0.4567(3) | 0.2500(3) | 0.2071(7) | 1.004     | 3.18               |
| O -2             | O3                                                                         | 0.1647(5) | 0.0445(1) | 0.2816(2) | 1.002     | 2.87               |
| Cell parameters  | a: 10.3618(2) Å b: 6.0360(5) Å c: 4.7070(4) Å V: 294.395(4) Å <sup>3</sup> |           |           |           |           |                    |
| wRp              | 8.59%                                                                      |           |           |           |           |                    |
| Rp               | 6.50%                                                                      |           |           |           |           |                    |
| CHI <sup>2</sup> | 1.144                                                                      |           |           |           |           |                    |

**Table S2:** The discharge capacities and capacity retention ratios for  $\text{LiFe}_{0.6}\text{Mn}_{0.4}\text{PO}_4/\text{C}$  at different current densities

| Discharge rate | $\text{LiFe}_{0.6}\text{Mn}_{0.4}\text{PO}_4/\text{C}$ microspheres |                         | $\text{LiFe}_{0.6}\text{Mn}_{0.4}\text{PO}_4/\text{C}$ nanoparticles |                         |
|----------------|---------------------------------------------------------------------|-------------------------|----------------------------------------------------------------------|-------------------------|
|                | Discharge capacity                                                  | Ratio $Q_{nc}/Q_{0.1C}$ | Discharge capacity                                                   | Ratio $Q_{nc}/Q_{0.1C}$ |
| 0.1C           | 163.7                                                               | 100%                    | 160.2                                                                | 100%                    |
| 1.0C           | 153.3                                                               | 93.6%                   | 146.2                                                                | 91.3%                   |
| 5.0C           | 143.8                                                               | 87.8%                   | 131.4                                                                | 82.0%                   |
| 10C            | 135.2                                                               | 82.6%                   | 123.3                                                                | 77.0%                   |
| 20C            | 126.0                                                               | 77.0%                   | 106.3                                                                | 66.3%                   |

**Table S3:** The discharge capacity and energy density data of the micro-spherical and nano  $\text{LiFe}_{0.6}\text{Mn}_{0.4}\text{PO}_4/\text{C}$  at different rates

| Sample                                                        | Index                                             | 0.1C  | 1C    | 5C    |
|---------------------------------------------------------------|---------------------------------------------------|-------|-------|-------|
| <b>nanoparticles</b><br>( $0.82\text{g}\cdot\text{cm}^{-3}$ ) | capacity ( $\text{mAh}\cdot\text{g}^{-1}$ )       | 163.7 | 153.3 | 143.8 |
|                                                               | Energy density ( $\text{Wh}\cdot\text{kg}^{-1}$ ) | 588.2 | 538.0 | 486.0 |
|                                                               | Energy density ( $\text{Wh}\cdot\text{L}^{-1}$ )  | 482.3 | 441.2 | 398.5 |
| <b>microspheres</b><br>( $1.4\text{g}\cdot\text{cm}^{-3}$ )   | capacity ( $\text{mAh}\cdot\text{g}^{-1}$ )       | 160.2 | 146.2 | 131.4 |
|                                                               | Energy density ( $\text{Wh}\cdot\text{kg}^{-1}$ ) | 572.5 | 502.4 | 438.3 |
|                                                               | Energy density ( $\text{Wh}\cdot\text{L}^{-1}$ )  | 801.5 | 703.4 | 613.6 |

**Table S4:** The discharge capacity and energy density of the  $\text{LiFe}_{0.6}\text{Mn}_{0.4}\text{PO}_4/\text{C}$  microspheres after long-term cycling

| Index                       | Before cycle                         |                                      | After cycle                          |                                      |
|-----------------------------|--------------------------------------|--------------------------------------|--------------------------------------|--------------------------------------|
|                             | Discharge capacity                   | Energy density                       | Discharge capacity                   | Energy density                       |
| 2C(100 <sup>th</sup> cycle) | 139.9 $\text{mAh}\cdot\text{g}^{-1}$ | 477.4 $\text{Wh}\cdot\text{kg}^{-1}$ | 138.3 $\text{mAh}\cdot\text{g}^{-1}$ | 473.5 $\text{Wh}\cdot\text{kg}^{-1}$ |
| 5C(200 <sup>th</sup> cycle) | 129.8 $\text{mAh}\cdot\text{g}^{-1}$ | 429.5 $\text{Wh}\cdot\text{kg}^{-1}$ | 128.4 $\text{mAh}\cdot\text{g}^{-1}$ | 420.8 $\text{Wh}\cdot\text{kg}^{-1}$ |

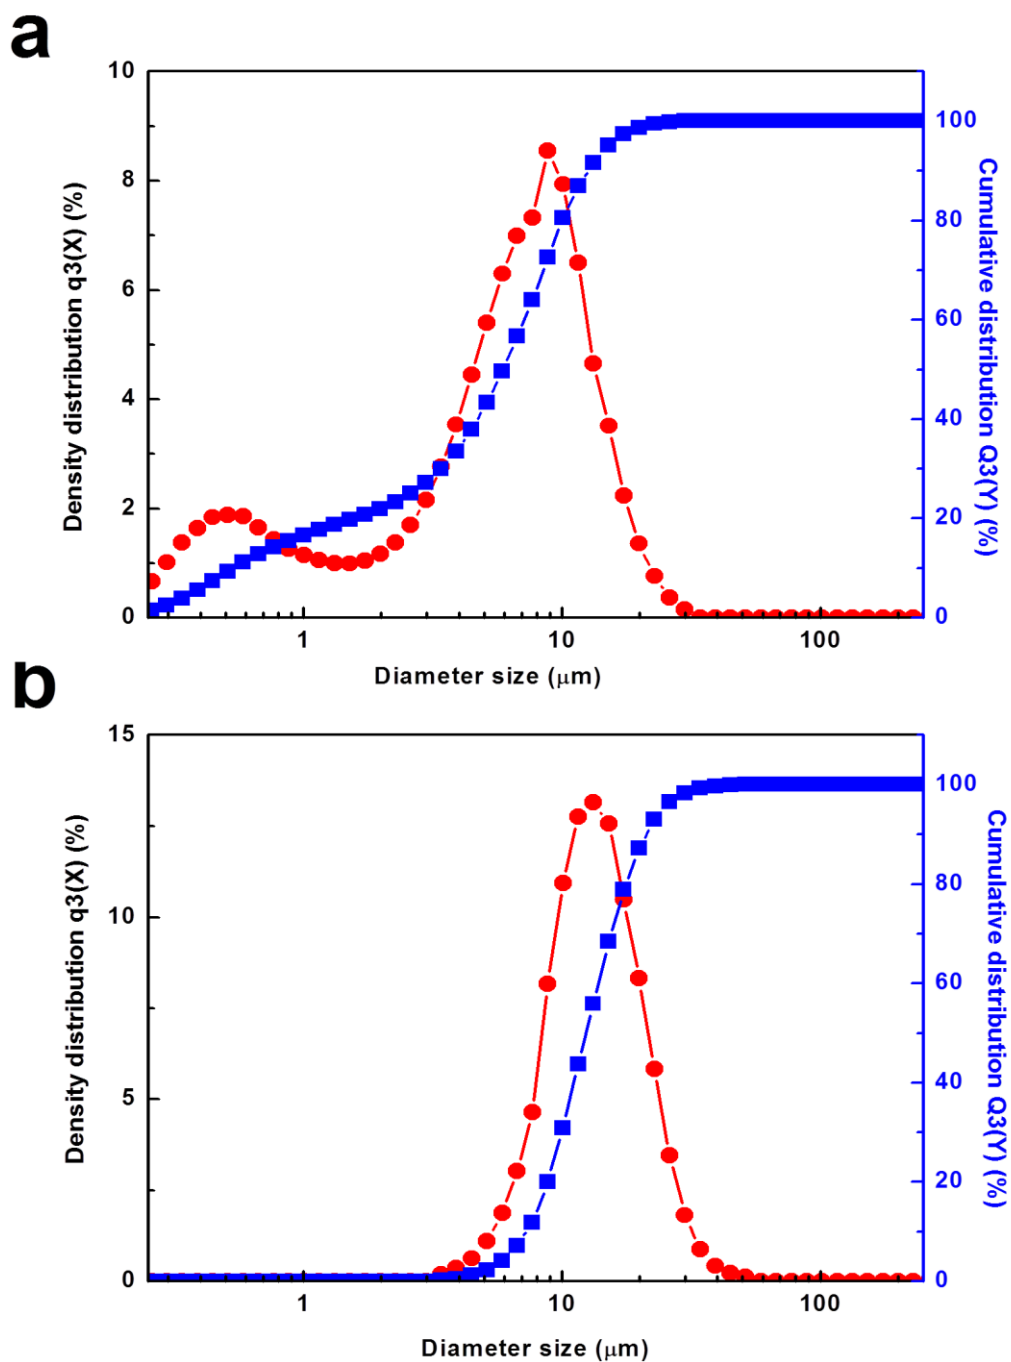

**Fig.S1** (a) The particle size distribution profiles for the  $\text{LiFe}_{0.6}\text{Mn}_{0.4}\text{PO}_4/\text{C}$  nanoparticles; (b) The particle size distribution profiles for the  $\text{LiFe}_{0.6}\text{Mn}_{0.4}\text{PO}_4/\text{C}$  microspheres.

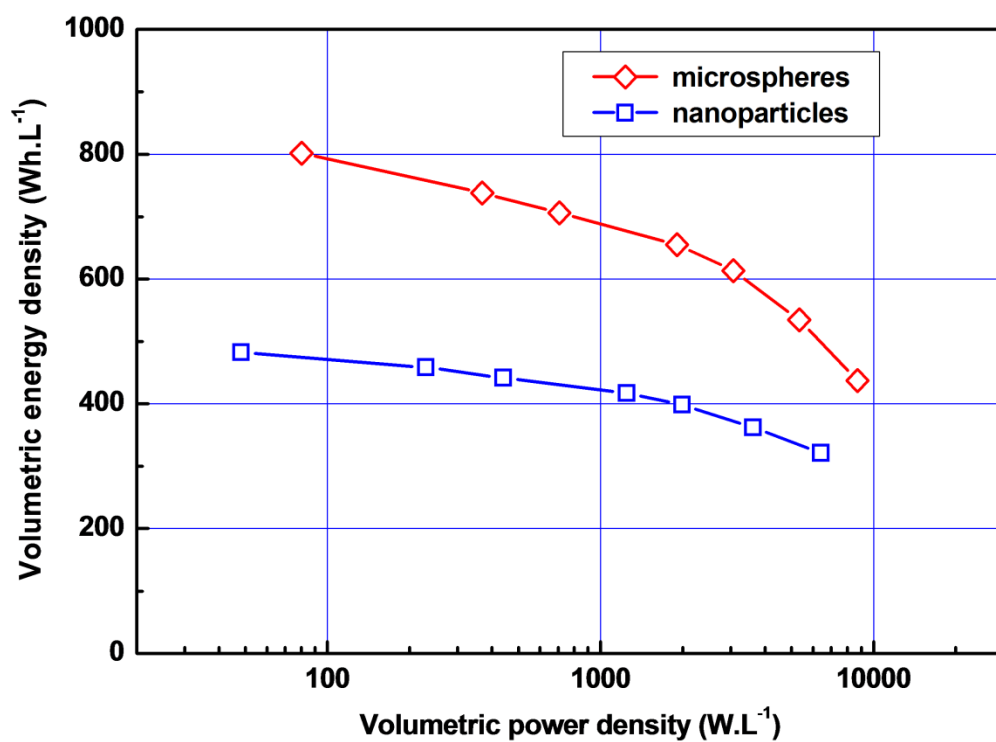

Fig.S2 Ragone plot of volumetric energy density vs. volumetric power density.

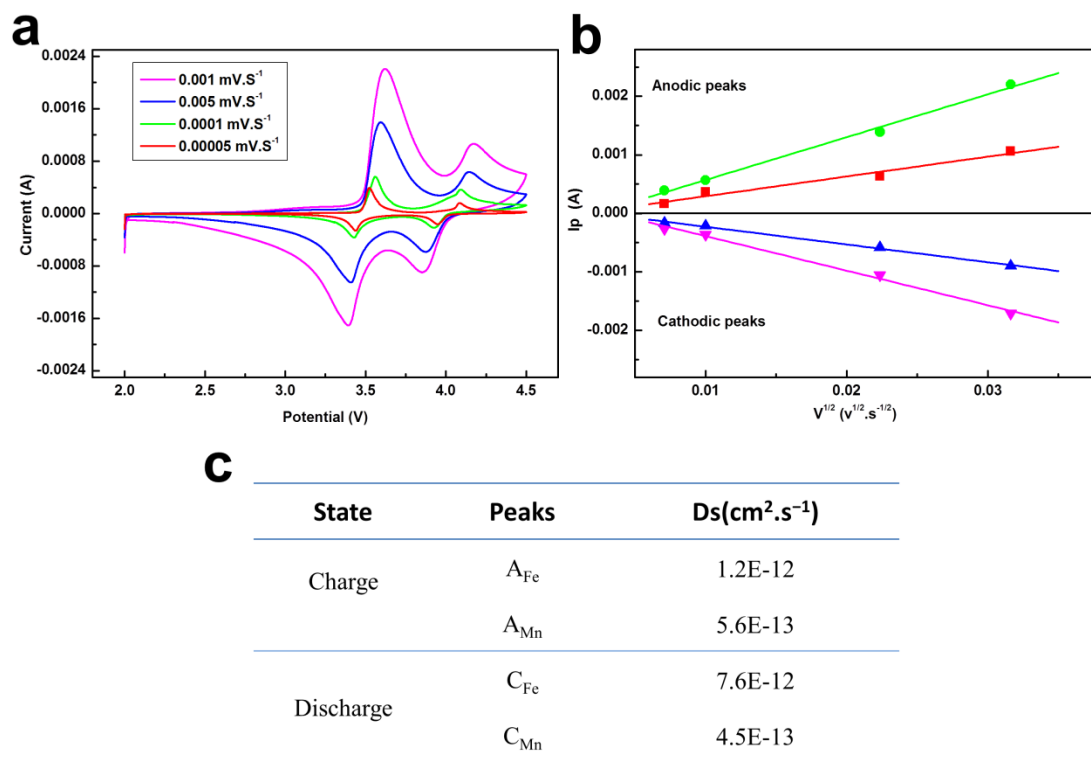

**Fig.S3** (a) CV curves of the LiFe<sub>0.6</sub>Mn<sub>0.4</sub>PO<sub>4</sub>/C microspheres at various scanning rates between 2.0 and 4.5 V; (b) the relationship between the peak current (Ip) and the square root of scan rate ( $v^{1/2}$ ); (c) The diffusion coefficients of lithium-ion in the spherical LiFe<sub>0.6</sub>Mn<sub>0.4</sub>PO<sub>4</sub>/C electrode calculated from CV curves.
